# Supplementary material
Source: Elsevier journal article supplement (https://publikationen.ub.uni-frankfurt.de/opus4/files/53563/mmc2.docx)
Supplement: mmc2 [file mmc2.docx]

**SUPPLEMENTARY MATERIAL**

**METHODS**

**Multimodal ABT segmentation**

The algorithm of multimodal ABT segmentation, which was implemented in MATLAB (MathWorks, USA), included three main steps: (1) pre-processing; (2) initialization; and (3) segmentation. A conceptual overview of the major steps of the algorithm (2 and 3) is shown in **appendix** **Figure 1.**

***Step 1: Pre-processing***

Pre-processing was performed with SPM12. All MR scans were bias-corrected for MR field inhomogeneity, co-registered to the T1w using linear (12-parameter affine) and nonlinear transformations and normalized to MNI (Montreal Neurological Institute) space. The normalized, bias-corrected T1w was used for tissue classification into GM, WM, and CSF, based on SPM tissue probability maps. The skull peeled mask was created as a combination of GM, WM, and CSF. The mask was required for anatomical localization of voxels in the skull peeled volume of interest.

***Step 2: Initialization***

In images from aSAH patients, the initial SPM-based segmentation contained overlap between ABT and GM, WM, and CSF. In order to estimate potential ABT class, an outlier detection technique was developed. At its core was comparison of patients’ MR images to specially created templates based on healthy control data. The T1w, DWI and FLAIR reference templates were developed by averaging corresponding scans of healthy subjects within the skull peeled volume of interest. The MR intensities corresponding to the pathological structures do not conform to the intensity distribution of the normal structures. Thus, the intensities of pathological structures such as *ABT* represent outliers in the normal intensity distribution defined by reference templates (Supplemental Material Fig. 1).

Due to differences in multicenter MR image acquisition protocols and the heterogeneity of healthy and pathological anatomy, MR data and templates transformation of the data into z-score space was performed:

,where and mean and standard deviation of an image within SP-VOI; *s={template, patient}* and *m={T1w, DWI, FLAIR}*. Since the upper tail of FLAIR intensities distribution could be influenced by the amount of hyper-intense *ABT* voxels, and were trimmed by cutoff the top λ% of voxels. λ was empirically set to 3% with possibility of manual adjustment, depending on *ABT* size.

Similarity of the templates and corresponding patient's MR data transformed into z-score space was evaluated by means of the Mahalanobis distance relying on the covariance matrix of the template:

where and are mean and covariance of the reference template *m.*

Thus, initial *ABT* was estimated as an aggregation of T1w, DWI and FLAIR outliers:

K-means was applied to perform further partition of the initial *ABT* into two classes, restricted and unrestricted diffusion, based on DWI channel data. Hence, initial labeling consisted of five tissue classes (*K*=5): GM, WM, CSF, and two *ABT* classes.

***Step 3: Segmentation***

The goal of segmentation was to assign each voxel *i* to one of *K* tissue classes based on initial labeling and MR dataset. Multimodal MR scans were modeled as multi-dimensional Gaussian distributions. This enabled combining multiple sequences in a single segmentation task. The segmentation problem was solved using expectation maximization for Gaussian mixture model52. The input multimodal MR dataset *X* for a patient consisted of *M* vectorized MR sequences as following:

SP-VOI,

so that , where *N* is number of voxels included in SP-VOI.

Since the matrix *X* incorporated data from different modalities, normalization procedure was essential. As an initial sub-step of the normalization, z-score transformation was applied to each individual *X* column. For the next sub-step, principal component analysis was devoted to z-score transformed *X* matrix and, as a result, a new data matrix was created. Percent variation explained by each component of was calculated based on eigenvalues. Components that accounted for at least 5% of the total variance were retained for further analysis. As a consequence of principal component analysis, the data were presented along maximum variance axes. Other benefits of this procedure were noise reduction and possible computation simplification due to projecting of *X* matrix into lower dimensional space.

The tissue class labeling matrix was denoted by

.

where is binary class membership component:

=.

The mean vector and covariance matrix within a class are described using and . The Gaussian mixture model distribution is expressed as a linear superposition of Gaussians in the form of

,

where denotes the probability density function of the *k*-th Gaussian component with unknown parameters, including mean vector, covariance matrix , and mixture proportion (or prior probability) . The was calculated as the number of voxels in each class divided by *N*. For convenience, we used to represent the unknown parameters. The maximum likelihood function was used to estimate set *θ* of the unknown parameters:

, and

.

EM algorithm was used to iteratively estimate optimal set of. First, initial labeling (*K=5*), obtained in Step 2, was applied to calculate (*t* denotes iteration number).

Second (expectation step), the posterior probability of the voxel *i* was calculated:

Third (maximization step), was used to update set of:

, where ,

,

Finally, expectation step and maximization step were repeated until convergence of .

The was classified based on the maximum posterior probability as

.

The *ABT* object was defined as a combination of two tissue classes:

In order to incorporate the information of neighboring to *ABT* pixels, a refining procedure was applied, which included two sub-steps: region-growing and morphological. First, adjacent to pixels *i* (8-connected *ABT* neighborhood ) were examined and determined, based on inclusion criteria, whether they should be included in the *ABT*. Thus, the neighboring pixels of the growing *ABT* were iteratively merged according to inclusion criteria:

.

Next, morphological refining of the *ABT* grown object was performed. To this end, small disconnected components with volume < 3 mm3 were detected and removed. Then, slice-wise morphological closing with a distance of 2 pixels was applied. In addition, the small regions (area < 16 mm2) completely surrounded by *ABT* were slice-wisely included into the final *ABT* object. The final *ABT* object was subdivided again into restricted and unrestricted diffusion objects, as described in Initialization (Step 2).

**Validation of the multimodal lesion segmentation method**

Since no gold standard for *ABT* segmentation exists, the designed algorithm was compared with manual segmentation. The manual segmentation was performed independently by experienced radiologist (I.S.), who was blinded to the study group, on an arbitrarily chosen subset of n=9 aSAH patients scanned at time point *t1*. Dice similarity coefficient (DSC)53 was used for assessment of volumetric agreement between automated (and (1) manual segmentation performed across multimodal MR data (, where *m={T1w, DWI, FLAIR}*:

; (2) combined multimodal manual segmentations:

, so that .

Accuracies of the proposed automatic multimodal ABT segmentation method were (1) based on a single MR mode manual segmentation: =86·5±11·3%, =78·8±8·7%, and =44·7±12·3%; and (2) the combined manually segmented ABTs (=94·6±12·4%). The significantly highest similarity was found between automatic multimodal *ABT* segmentation and combined manually *ABT* data (p=0·044, Kruskal-Wallis test with Bonferroni post-hoc correction), with no significant difference between and (p=0·431), while the manual segmentation based on T1w sequence showed the lowest similarity with the automatic segmentation (p<0·001).

**BBB permeability evaluation**

A practical approach for CE-MRI-based assessment of BBB integrity was developed in-house as previously described (Chassidim et al 2013). Briefly, T1wC scan is contrast-enhanced in regions where tracer is accumulated due to BBBD, causing leak of the contrast agent from the vasculature into the brain tissue. Pathologically BBB-enhanced voxels were identified by calculating the percent signal difference between T1w and T1wC sequences. For each subject, Gaussian fits to enhancement distribution histograms were estimated for three regions representing tissue that is enhanced after gadolinium injection (temporal muscle), non-enhanced tissue (mid-vitreous body) and tracer-rich blood vessels (confluence point between super sagittal sinus and transverse sinuses) (**appendix, Figure 2A**). A mid-vitreous body region of interest was selected to exclude noise and tracer-rich blood vessels region was selected to exclude normally enhanced vasculature. Two intersection points were used to estimate an enhancement range indicative of brain tissue lacking a normal BBB: intersection between Gaussian fits to mid-vitreous body and muscle (τ1) and intersection between Gaussian fits to muscle and blood vessel region (τ2). A morphological filtering procedure, based on connected components labeling, was applied such that clusters smaller than 4 neighboring voxels were removed. The detected brain tissue with BBBD was used to define the final brain region with BBBD by appending connected neighboring voxels (8-connectivity) with expanded enhancement range of 0·5τ1-1·5τ2 (**appendix, Figure 2B**). BBBD enhancement map (BBBDEM) was created by reassigning each voxel of BBBD with its enhancement level. The final BBBDEM was normalized to 0-1 range.

The ‘normal amount/volume’ of BBBD was defined as the range of values that encompasses 95% of brain volume in controls. We considered “resolution” of vascular permeability to values of “healthy controls” (BBBD resolved) when BBBD volume was reduced below the upper bound of 95% CI of controls.

*ABT* **vicinity analysis**

To this end, two objects in the vicinity of the *ABT* were generated based on distance transform map (*DTM*), where each non-*ABT* voxel was assigned with its Euclidian distance to the closest *ABT* edge voxel. Non-*ABT* voxels located at formed the first in the vicinity of the *ABT* object and second was.

The and objects were used to quantify amounts of BBB permeability at *ABT* surrounding fields: and , where *j=1,…,3* correspond to *t1-t3*.

**Patient grouping based on imaging-detected loss of normal brain tissue during the clinical course**

Quantitative assessment of *NBT* volume in successive scans allowed us to follow-up apparently healthy brain tissue over time. ‘Loss of normal brain tissue’ represented the combined contribution of two principle pathways: growth of the *ABT* volume and *CSF* volume expansion. Patients were divided into two groups: those with an increasing volume of *ABT* and/or *CSF* volume expansion (progressive disease course, PC) and those without (non-progressive disease course, NPC). The criterion for patient categorization was the rate of brain tissue loss (*C*), which was calculated using the following natural logarithmic function fit:

*NBT* = *C* × ln(*t*) + *Co*.

In which t is the time post onset (*t2-t4*, in days), *NBT* is the brain tissue volume (ml) at the time *t*, *C* and *Co* are model's coefficients, where slope *C* represents brain tissue loss rate.
